# Supplementary material for: Synergistic Effect of High Charge and Energy Particle Radiation and Chronological Age on Biomarkers of Oxidative Stress and Tissue Degeneration: A Ground-Based Study Using the Vertebrate Laboratory Model Organism Oryzias latipes
Source: PubMed Central journal article supplement (PMC4222877; doi:10.1371/journal.pone.0111362), 2014-11-06
Supplement: pone.0111362.s006.pdf [file pone.0111362.s006.pdf]

Table S1

Functional category, gene symbol, sequences, and ENSEMBL transcript identifiers for qPCR primers

| Category                          | Gene     | Primer sequence (5'-3')                                                                   | ENSEMBL transcript ID |
|-----------------------------------|----------|-------------------------------------------------------------------------------------------|-----------------------|
| Mitochondria/antioxidant response | PPARGC1A | TCAAGACGGAGAGCCCCTG<br>AGAGCCAATCCGCTCTTGTC<br>TGACTGCACAGTTACCCTT<br>TCCATCAGCTCCCCTTGCG | ENSORLT00000006028    |
|                                   | SOD2     | CTACTGTTTCCGTCCTTCGT<br>CTCAGGCTCCAGAAGTCCCA                                              | ENSORLT00000016614    |
|                                   | CAT      | AACATCTTCAACGTGGAGAAA<br>GCTTGGTAGAAATCTGTGATGT                                           | ENSORLT00000002176    |
| Proliferation/antiproliferation   | CDKN1A   | AGAGCTGACTCTGCAGGACATT<br>CTGCCCGGAGACCTGAAAT                                             | ENSORLT00000000343    |
|                                   | SIRT3    | GCAAGAAGGCTTTTGCCAA<br>CCAAGAAGAGGAAGGGTAAGATGT                                           | ENSORLT00000004888    |
| Paracrine signaling               | PTGES    | TCGCAGACAGAATGCAGAAGGAGA<br>ACTCCTGCTTGCTGATCCACATCT                                      | ENSORLT00000017152    |
| Internal reference                | ACTB     | TGTCATCAGGATCCGAGGTATCA<br>TACACCGTTGAAGATCTGGCG                                          | ENSORLT00000009998    |
|                                   | RPL 7    |                                                                                           |                       |
