# Supplementary material for: Synergistic Effect of High Charge and Energy Particle Radiation and Chronological Age on Biomarkers of Oxidative Stress and Tissue Degeneration: A Ground-Based Study Using the Vertebrate Laboratory Model Organism Oryzias latipes
Source: PubMed Central journal article supplement (PMC4222877; doi:10.1371/journal.pone.0111362), 2014-11-06
Supplement: pone.0111362.s007.pdf [file pone.0111362.s007.pdf]

Table S2  
Age and dose dependence for expression of select mRNAs

| Category                          | Gene     | Predictor | HZE                |                       |                 | γ-ray              |                       |                 |
|-----------------------------------|----------|-----------|--------------------|-----------------------|-----------------|--------------------|-----------------------|-----------------|
|                                   |          |           | Parameter estimate | Parameter uncertainty | P value         | Parameter estimate | Parameter uncertainty | P value         |
| Mitochondria/antioxidant response | PPARGC1A | Intercept | -0.86              | 0.35                  | 0.014           | 1.55               | 0.30                  | 0.0001          |
|                                   |          | Age       | -0.003             | 0.0007                | <0.0001         | -0.004             | 0.0006                | <0.0001         |
|                                   |          | Dose      | -0.19              | 0.09                  | 0.03            | -0.09              | 0.03                  | 0.0005          |
|                                   | SOD2     | Intercept | -0.26              | 0.17                  | 0.1255          | NS <sup>a</sup>    | NS <sup>a</sup>       | NS <sup>a</sup> |
|                                   |          | Age       | 0.002              | 0.0004                | 0.0001          | NS <sup>a</sup>    | NS <sup>a</sup>       | NS <sup>a</sup> |
|                                   |          | Dose      | -0.08              | 0.04                  | 0.0445          | NS <sup>a</sup>    | NS <sup>a</sup>       | NS <sup>a</sup> |
|                                   | CAT      | Intercept | NS <sup>a</sup>    | NS <sup>a</sup>       | NS <sup>a</sup> | 0.83               | 0.23                  | 0.0004          |
|                                   |          | Age       | NS <sup>a</sup>    | NS <sup>a</sup>       | NS <sup>a</sup> | -0.003             | 0.0005                | <0.0001         |
|                                   |          | Dose      | NS <sup>a</sup>    | NS <sup>a</sup>       | NS <sup>a</sup> | 0.006              | 0.020                 | 0.7817          |
| Proliferation/antiproliferation   | CDKN1A   | Intercept | -0.53              | 0.46                  | 0.2534          | -0.60              | 0.40                  | 0.1374          |
|                                   |          | Age       | -0.002             | 0.0001                | 0.0212          | 0.002              | 0.0009                | 0.0145          |
|                                   |          | Dose      | -0.37              | 0.11                  | 0.0017          | -0.10              | 0.0040                | 0.0040          |
|                                   | SIRT3    | Intercept | -0.03              | 0.26                  | 0.9180          | NS <sup>a</sup>    | NS <sup>a</sup>       | NS <sup>a</sup> |
|                                   |          | Age       | -0.001             | 0.0006                | 0.0317          | NS <sup>a</sup>    | NS <sup>a</sup>       | NS <sup>a</sup> |
|                                   |          | Dose      | 0.19               | 0.06                  | 0.0028          | NS <sup>a</sup>    | NS <sup>a</sup>       | NS <sup>a</sup> |
| Paracrine signaling               | PTGES    | Intercept | -0.20              | 0.19                  | 0.2971          | 1.19               |                       | <0.0001         |
|                                   |          | Age       | -0.08              | 0.05                  | 0.0059          | -0.002             | 0.0009                | <0.0001         |
|                                   |          | Dose      | -0.001             | 0.0004                | 0.0774          | -0.10              | 0.04                  | 0.0040          |

<sup>a</sup>NS Non-significant. Assumptions violated for univariate model.  
Units for age are days; units for dose are Gy. Parameters are for  $\Delta\Delta C_t$
